# Supplementary material
Source: Springer Nature journal article supplement (https://www.springermedizin.de/resource/supplementary/12985_2014_2489_MOESM1_ESM.pdf/9606850)

Mean CIC Extinction at 405 nm

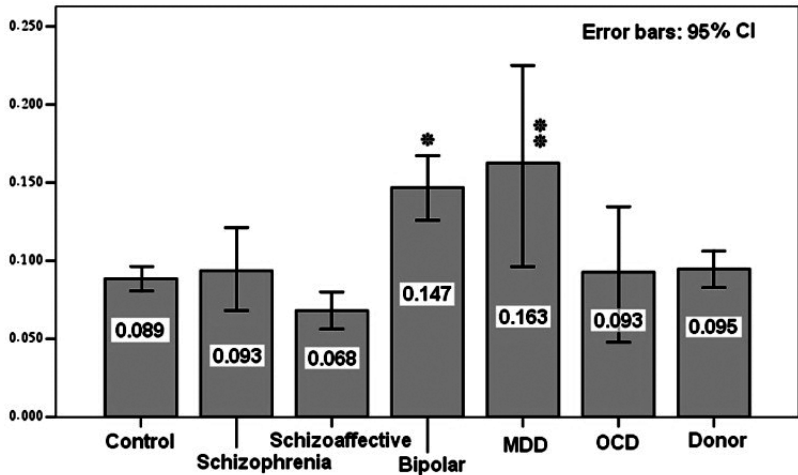

Supplement: MOESM1 [file 9606850]
